# Supplementary material for: Liraglutide Inhibits Endothelial-to-Mesenchymal Transition and Attenuates Neointima Formation after Endovascular Injury in Streptozotocin-Induced Diabetic Mice
Source: PubMed Central journal article supplement (PMC6628350; doi:10.3390/cells8060589), 2019-06-14
Supplement: cells-08-00589-s001.pdf [file cells-08-00589-s001.pdf]

**Supplementary Table S1. Primers used in this study**

---

| Gene       | specific oligonucleotide primers for target sequences          |
|------------|----------------------------------------------------------------|
| CD31       | F: 5'-CAACGAGAAAATGTCAGA-3'<br>R: 5'-GGAGCCTTCCGTTCTAGAGT-3'   |
| Vimentin   | F: 5'-GCAAAGATTCCACTTTGCGT-3'<br>R: 5'-GAAATTGCAGGAGGAGATGC-3' |
| SM22alpha  | F: 5'-CTGAGGACTATGGGGTCATC-3'<br>R: 5'-TAGTGCCCATCATTCTTGGT-3' |
| Snail      | F: 5'-GCTGCAGGACTCTAATCCAGA-3'<br>R: 5'-ATCTCCGGAGGTGGGATG-3'  |
| Beta-actin | F: 5'-CCAACCGCGAGAAGATGA-3'<br>R: 5'-CCAGAGGCGTACAGGGATAG-3'   |

---

## Supplementary Table S2

### Serum glucose levels of the mice at different stages between the experimental groups

|          | Sham           | Wire-injury    | Wire-injury with Liraglutide<br>treatment | <i>p</i> |
|----------|----------------|----------------|-------------------------------------------|----------|
| Baseline | 131.5 +/- 5.7  | 137.4 +/- 4.8  | 132 +/- 5.2                               | 0.907    |
| Day 0    | 564.5 +/- 23.5 | 546.7 +/- 21.4 | 568.8 +/- 30.2                            | 0.876    |
| Day 14   | 402.2 +/- 10.3 | 410.5 +/- 14.8 | 432.2 +/- 29.6                            | 0.206    |
| Day 28   | 452.4 +/- 11.7 | 449.9 +/- 13.2 | 484.0 +/- 34.6                            | 0.106    |

The data is shown as the mean  $\pm$  SEM from all groups (n = 10, in each group) and analysed with one-way non-parametric ANOVA test. Day 0, 14, 28 indicated the days post wire-injury.
